# Supplementary material for: Complex interplay of forcings drives Indian vegetation and summer monsoon variability during MIS 11
Source: Copernicus journal article supplement (doi:10.5194/egusphere-2024-3341), 2024-11-22
Supplement: Supplementary file 1 [file egusphere-2024-3341-supplement.pdf]

**Table S1.** IODP Site U1446 age-depth tie points from Clemens et al. (2021). \*New control point added for this study.

| <b>Site U1446<br/>CCSFD (m)</b> | <b>Control points<br/>LR04 Age (ka)</b> |
|---------------------------------|-----------------------------------------|
| 73,43                           | 382,27                                  |
| 76,141*                         | 401*                                    |
| 81,3                            | 428,24                                  |
| 82,07                           | 436,77                                  |
| 67.93                           | 490,93                                  |

**Table S2.** Regression coefficients (R) of linear regression between simulated tree fraction and climate variables for the transient experiments with time-varying insolation and CO<sub>2</sub> concentration. The calculation was performed on the 1000-year running mean of the original simulated data.

|                           | <b>R</b> |
|---------------------------|----------|
| Annual mean temperature   | 0,349    |
| Annual mean precipitation | 0,996    |
